# Supplementary material for: T Cells Expressing a Modified FcγRI Exert Antibody-Dependent Cytotoxicity and Overcome the Limitations of CAR T-cell Therapy against Solid Tumors
Source: PubMed Central journal article supplement — Cancer Immunol Res. 2023 Apr 18;11(6):792–809. doi: 10.1158/2326-6066.CIR-22-0423 (PMC10236152; doi:10.1158/2326-6066.cir-22-0423), 2023-04-18
Supplement: cir-22-0423_supplementary_data_suppst1-st2_sf1-sf8.pdf [file cir-22-0423_supplementary_data_suppst1-st2_sf1-sf8.pdf]

Table 2

| Metal | Extracellular markers | Intracellular markers | Clone       | Vendor      |
|-------|-----------------------|-----------------------|-------------|-------------|
| 111Cd | CD45.1                |                       | A20         | Biolegend   |
| 112Cd | CD45.2                |                       | 104         | Biolegend   |
| 114Cd | CD8                   |                       | 53-6.7      | Biolegend   |
| 115In | CD3                   |                       | 145-2C11    | Biolegend   |
| 116Cd | CD140b (PDGFR beta)   |                       | APB5        | Biolegend   |
| 142Nd | Tim-3                 |                       | RMT3-23     | Biolegend   |
| 143Nd | CD86                  |                       | GL-1        | Biolegend   |
| 144Nd | F4/80                 |                       | BM8         | Biolegend   |
| 145Nd | CD4                   |                       | RM4-5       | Biolegend   |
| 147Sm | Ly6c                  |                       | HK1.4       | Biolegend   |
| 148Nd | CD11b                 |                       | M1/70       | Fluidigm    |
| 149Sm | CD19                  |                       | 6D5         | Biolegend   |
| 150Nd | Ly6g                  |                       | 1A8         | Biolegend   |
| 151Eu | CD206                 |                       | C068C2      | Biolegend   |
| 152Sm | TCRyd                 |                       | UC7-13D5    | Biolegend   |
| 153Eu |                       | pStat-1 (Y701)        | 58D6        | Fluidigm    |
| 154Sm | CD11c                 |                       | N418        | Biolegend   |
| 155Gd | IgM                   |                       | RMM-1       | Biolegend   |
| 156Gd | CD25                  |                       | 3C7         | Biolegend   |
| 157Gd | CD40                  |                       | HM40-3      | Biolegend   |
| 158Gd | PD-1 CD279            |                       | RMP1-30     | Biolegend   |
| 159Tb |                       | ROrg(t)               | B2D         | Fluidigm    |
| 160Gd |                       | T-bet                 | 4B10        | Biolegend   |
| 161Dy | CX3CR1                |                       | SA011F11    | Biolegend   |
| 162Dy | CD64                  |                       | X54-5/7.1   | Biolegend   |
| 163Dy | CD127                 |                       | A7R34       | Biolegend   |
| 164Dy | Sca-1                 |                       | D7          | Fluidigm    |
| 165Ho |                       | FoxP3                 | FJK-16s     | Fluidigm    |
| 166Er | SiglecF               |                       | 238023      | RnD systems |
| 167Er |                       | GATA3                 | TWAJ        | Fluidigm    |
| 168Er | CD115                 |                       | AFS98       | Biolegend   |
| 169Tm | TCRb                  |                       | H57-597     | Fluidigm    |
| 170Er | CD62L                 |                       | MEL-14      | Biolegend   |
| 171Yb | CD44                  |                       | IM7         | Biolegend   |
| 172Yb | CD184                 |                       | L276F12     | Biolegend   |
| 173Yb | CD69                  |                       | H1.2F3      | Biolegend   |
| 174Yb | I-A/I-E               |                       | M5/114.15.2 | Biolegend   |
| 175Lu | IgD                   |                       | 11-26c.2a   | Biolegend   |
| 176Yb | LAG3                  |                       | C9B7W       | Biolegend   |

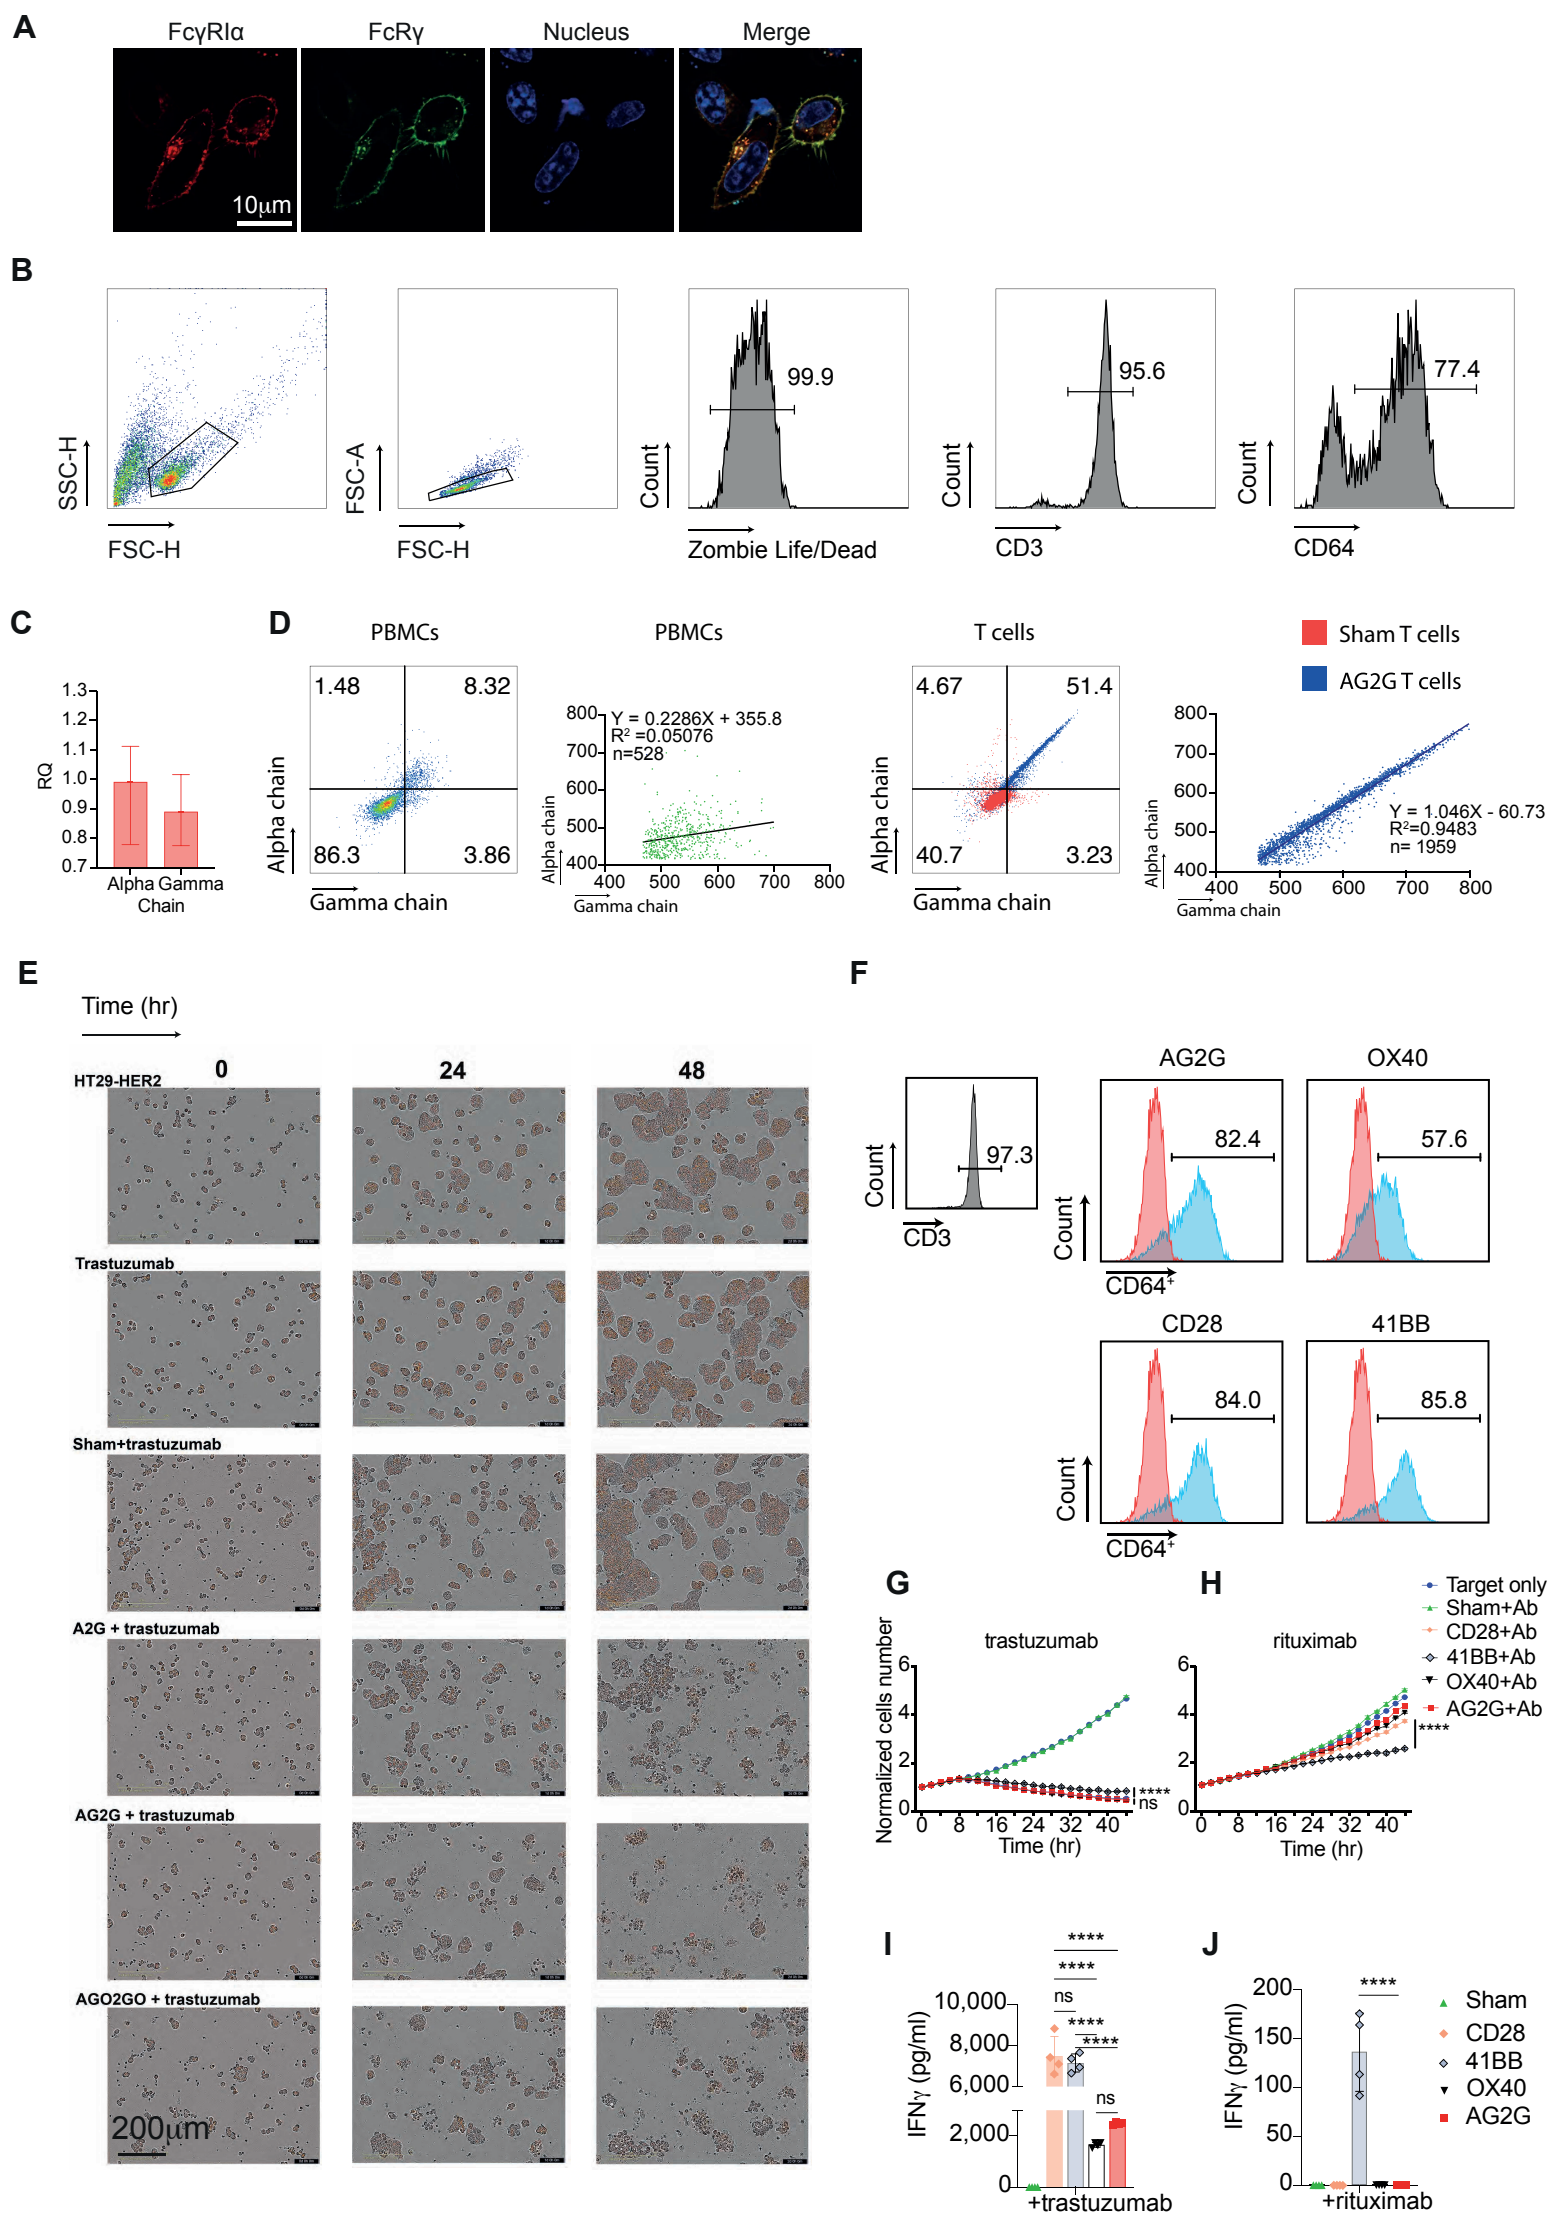

Supplemental Figure S1. The cytotoxic activity and cytokine secretion of T cells expressing altered version of Fc $\gamma$ RI.

**A.** Confocal images of HeLa cells co-transfected with Fc $\gamma$ RI alpha chain-mCherry and FcR $\gamma$  chain-EGFP. Magnitude x400. **B.** Flow cytometry analysis of AG2G-transduced T cells. **C.** Real-Time PCR relative quantification of alpha and gamma chain parts of AG2G coding sequence from T cells transduced with AG2G. **D.** Flow cytometry analysis of PBMCs, Sham-T cells and AG2G-expressing T cells for the FcR alpha and gamma chains expression (left), and linear regression analysis of the double positive cells (right). Analysis was performed by simple linear regression (GraphPad prism 9.4.1) **E.** Representative images showing HT29 HER2 expressing cells, imaged and counted in a live imaging system after 48 h of incubation with different constructs expressing T cells with 1:1 E:T ratio. **F.** Flow cytometry analysis of T cells transduced with AG2G, AG2G with OX40 addition, CD28 addition and 4-1BB addition fusion receptors. **G.** Mean numbers of HT29 cells expressing HER2 following incubation with AG2G, AG2G with OX40 addition, CD28 addition and 4-1BB addition fusion receptors -expressing T cells in combination with trastuzumab over 44 h (n=4, 4:1 E:T ratio, 12  $\mu$ g/ml trastuzumab). **H.** Mean numbers of HT29 cells expressing HER2 following incubation with AG2G, AG2G with OX40 addition, CD28 addition and 4-1BB addition fusion receptors -expressing T cells in combination with the irrelevant antibody rituximab over 44 h (n=4, 4:1 E:T ratio, 12  $\mu$ g/ml trastuzumab). **I.** IFN $\gamma$  levels from supernatants of cytotoxic assay (described in **G**). **J.** IFN $\gamma$  levels from supernatants of cytotoxic assay (described in **H**). Statistical significance was calculated using two-way ANOVA with Tukey's correction (**G** and **H**) or ordinary one way ANOVA with Tukey's correction (**I** and **J**). \*\*\*\* denotes p<0.0001. Error bars represent

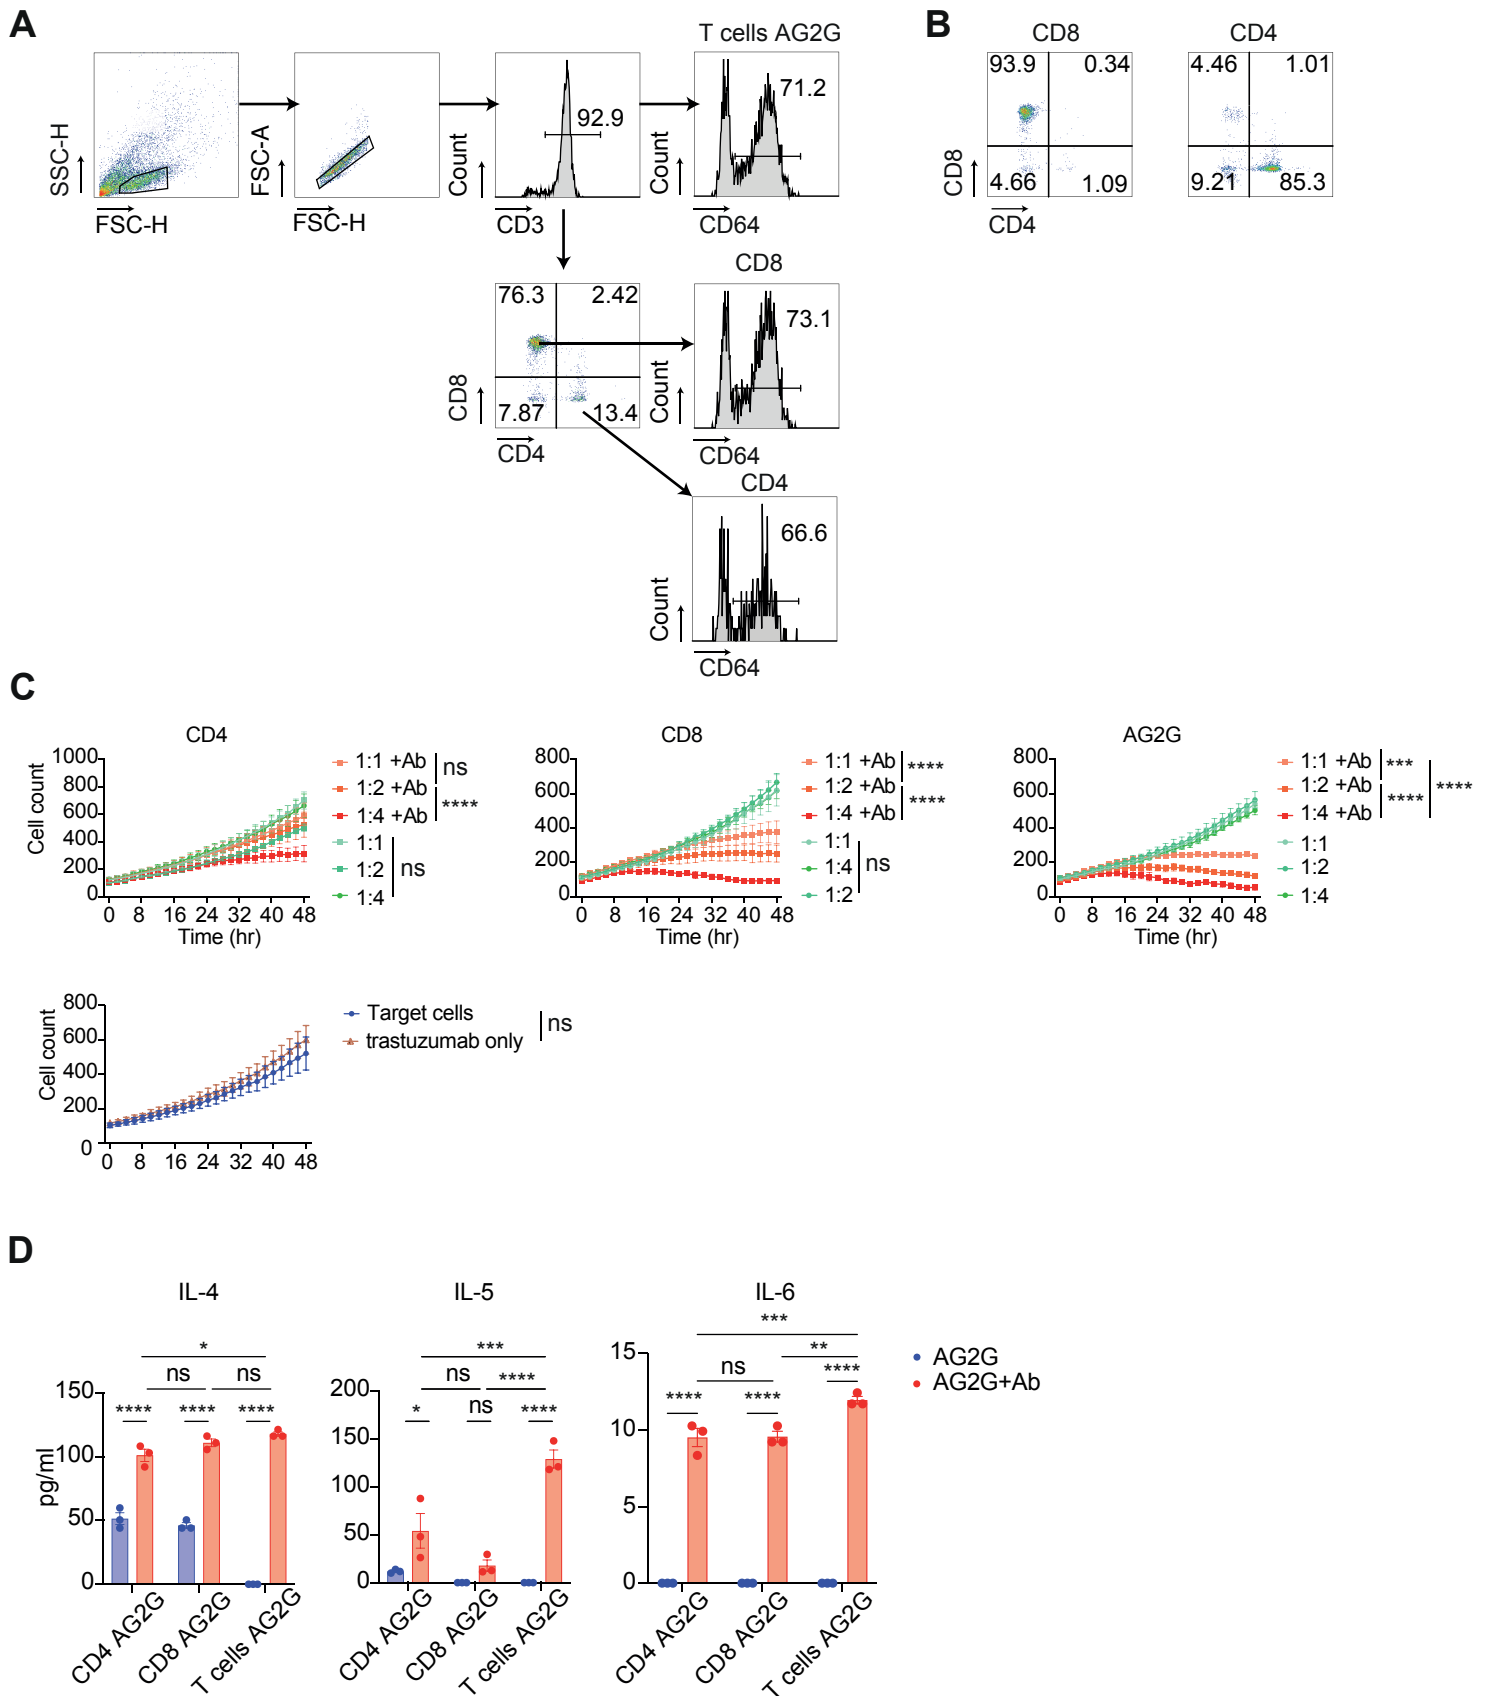

Supplemental Figure S2. The activation, cytotoxicity, and characterization of AG2G-expressing T cells.

**A.** Flow cytometry analysis of AG2G-expressing cells, 6 days following retrovirus transduction. **B.** Flow cytometry analysis of AG2G-expressing cells, following magnetic separation of CD8 and CD4 T cell populations. **C.** Mean numbers of HT29 cells expressing HER2 following incubation with different E:T ratios of AG2G-expressing T cells that were isolated for their CD4 (left) or CD8 (middle) population or with no isolation (right). **D.** Cytokine levels measured from supernatants of 48 h culture of 4:1 E:T ratios of isolated CD4, isolated CD8, or AG2G-expressing T cells with HT29 cells expressing HER2 and 30 ug/ml trastuzumab.



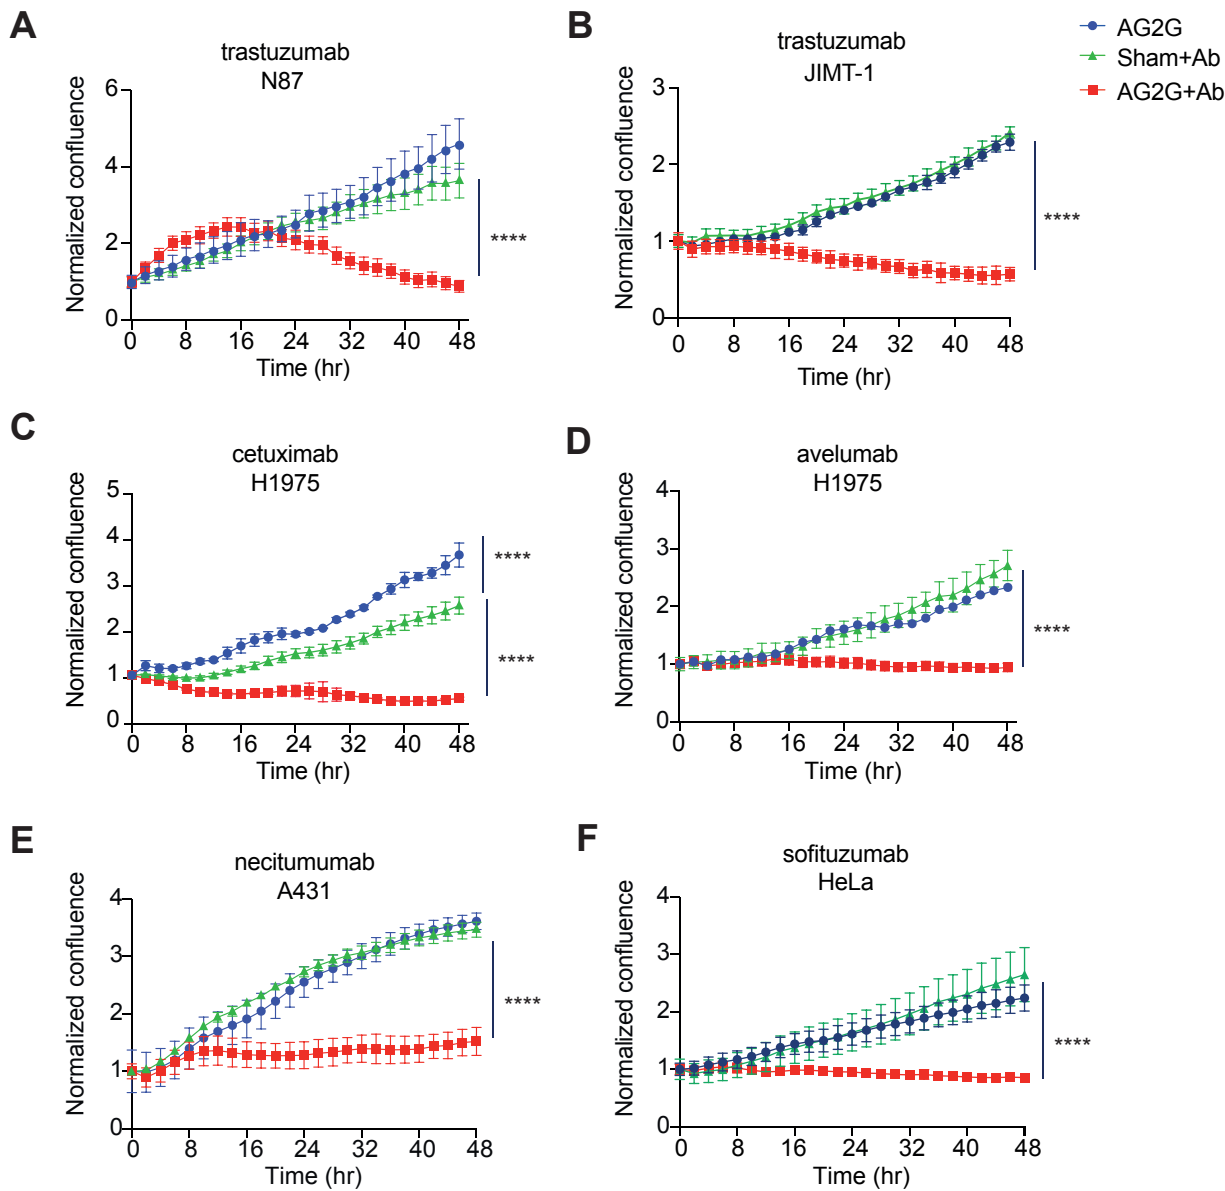

**Supplemental Figure S3. AG2G-expressing T cells exhibit cytotoxic activity against different targets once combined with a variety of tumor targeting antibodies.**

Confluence analysis of tumor cells over 48 h of co-culture in IncuCyte imager with non-transduced T cells (Sham) with targeting antibody or AG2G-expressing cells with or without targeting antibody. **A.** NCI-N87 cells targeted with anti-HER2 trastuzumab (4:1 E:T ratio, n= 4, 30 µg/ml antibody). **B.** JIMT-1 cells targeted with anti-HER2 trastuzumab (4:1 E:T ratio, n= 4, 30 µg/ml antibody). **C.** NCI-H1975 cells targeted with anti-EGFR cetuximab (4:1 E:T ratio, n=3, 60 µg/ml antibody). **D.** NCI-H1975 cells targeted with anti-PD-L1 avelumab (4:1 E:T ratio, n=3, 60 µg/ml antibody). **E.** A431 cells targeted with anti-EGFR necitumumab (4:1 E:T ratio, n=3, 30 µg/ml antibody). **F.** HeLa cells targeted with anti-MUC16 sofituzumab (4:1 E:T ratio, n=4, 30 µg/ml antibody). Statistical significance was calculated using ANOVA with Tukey's correction for multiple comparisons. \*\*\* denotes  $p < 0.001$ , \*\*\*\* denotes  $p < 0.0001$ . Error bars represent standard error.

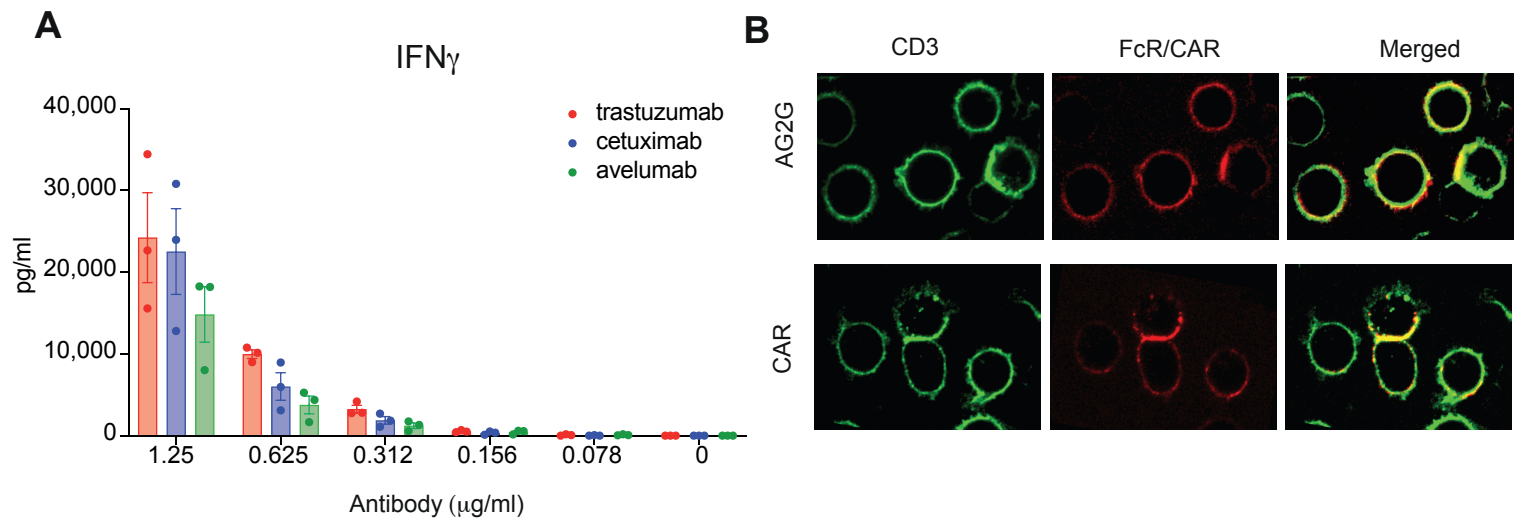

Supplemental Figure S4. AG2G-expressing T cells differentiate between cells expressing high and low antigen levels, are more specific, and less exhausted, compared to classic CAR-T cells.

**A.** IFN $\gamma$  levels from 24 h supernatants of  $10^5$  AG2G-expressing T cells incubated on ELISA plate pre-coated overnight with the indicated concentration of either trastuzumab, cetuximab or avelumab. **B.** Confocal images of T cells transduced with AG2G stained with anti-CD64 and anti-CD3 or T cells transduced with CAR-HER2, stained with PE-labeled soluble HER2 and anti-CD3. Magnitude x400.

**A**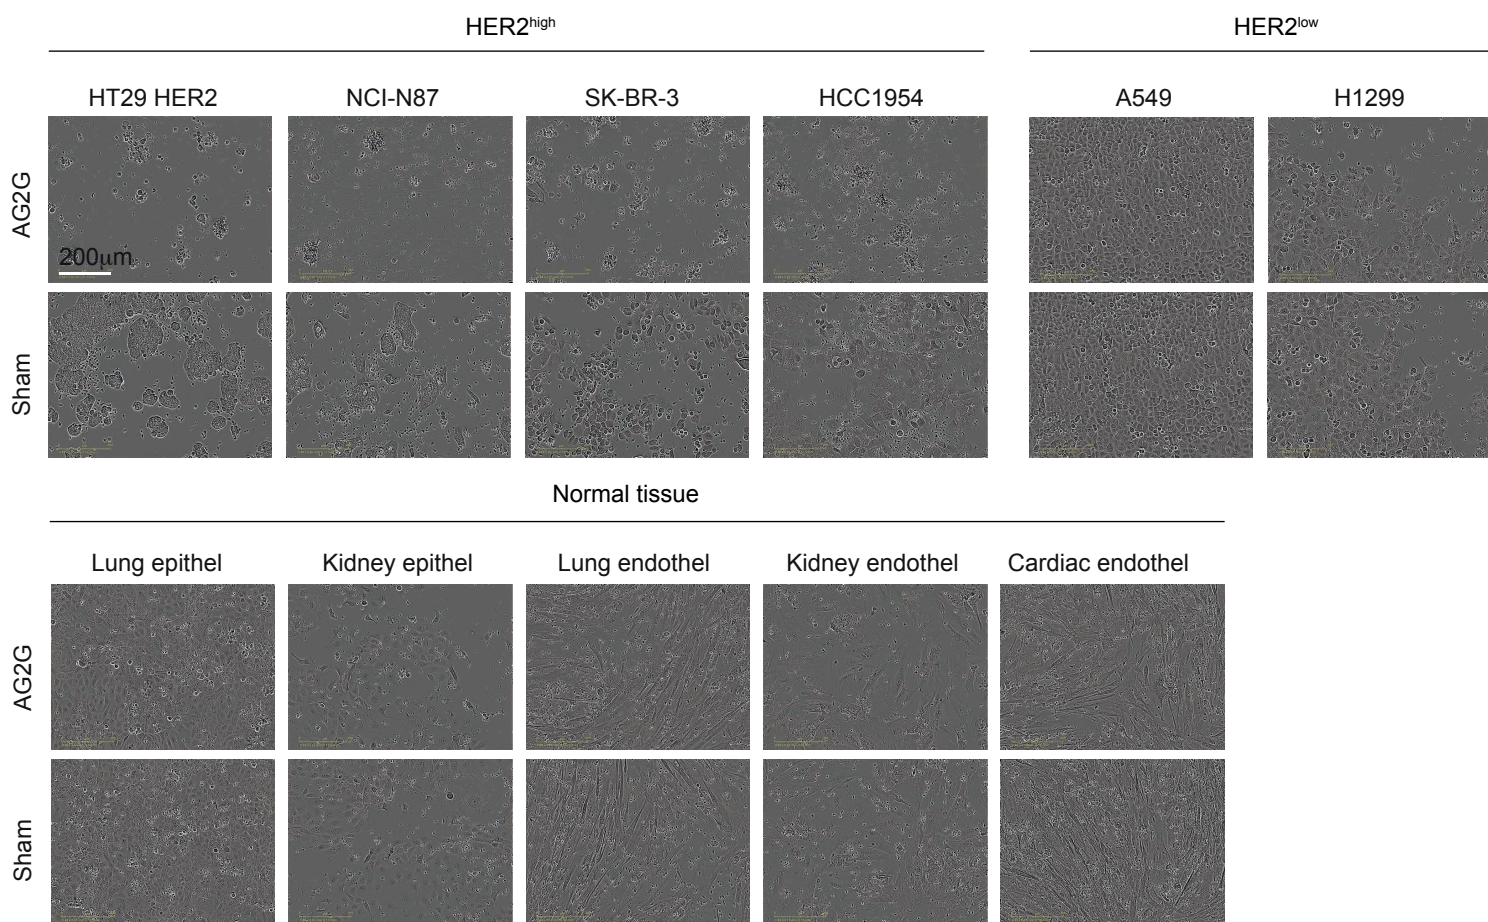**B**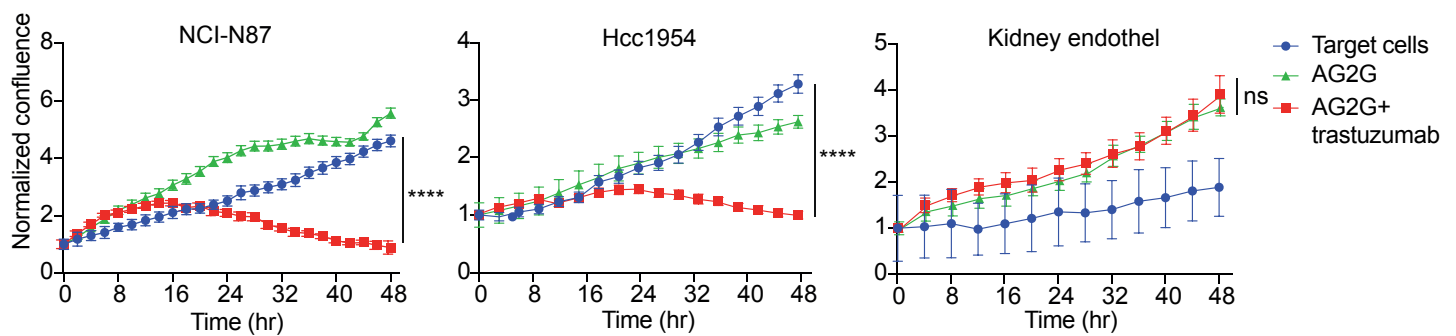**C**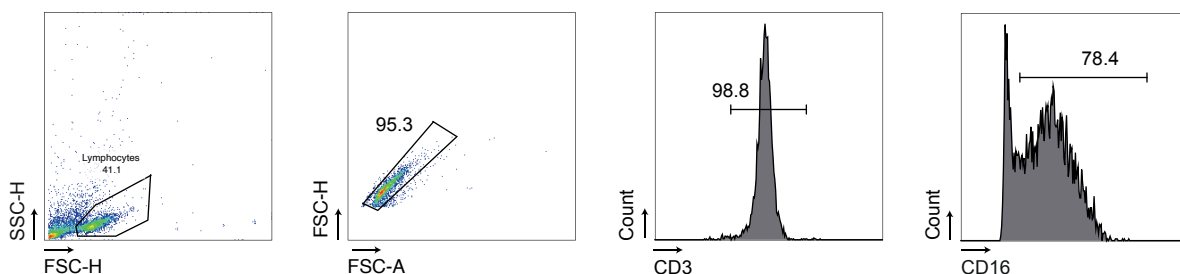**D**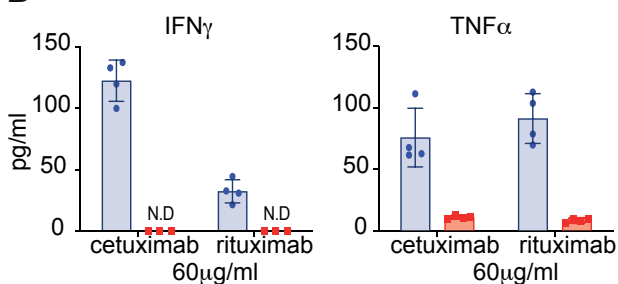**E**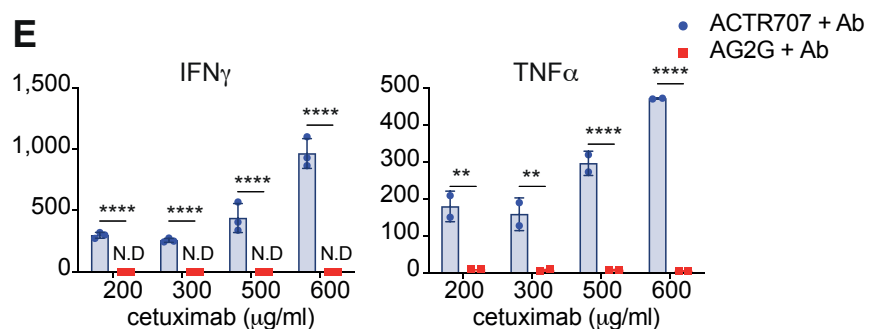

Supplemental Figure S5. Human AG2G-expressing T cells exert tumor specific cytotoxicity while sparing normal cells.

**A.** Representative images of 48 h co-culture sham-T cells or AG2G-expressing T cells with trastuzumab and tumor cells or tissue cells described in Fig 4. **A-B.** Percent confluence was normalized to initial percent confluence in each well and plotted over 48 hours in 2 hour intervals. Target cells (NCI-N87, Hcc1954, Kidney endothel) were co cultured with effector cells in E:T 4:1 ratio. Groups with trastuzumab were supplemented with 6µg/ml trastuzumab at time 0 (n=4). Statistical significance was calculated using two-way ANOVA with Sidak correction for multiple comparisons. For NCI-N87, AG2G+Ab and AG2G data sets are also shown in Fig. S3A. **C.** Flow cytometry analysis of T cells transduced with ACTR707 (FcyRIII-CD28-CD3 $\zeta$ ). **D.** IFN $\gamma$  and TNF $\alpha$  levels from supernatants of T cells transduced with AG2G or ACTR707 (FcyRIII-CD28-CD3 $\zeta$ ) transduced cells, after 48h co-culture with HT-29 HER2-expressing cells, with 60 µg/ml of irrelevant antibodies (4:1 E:T ratio, n=4). **E.** IFN $\gamma$  and TNF $\alpha$  levels from supernatants of T cells transduced with AG2G or ACTR707 (FcyRIII-CD28-CD3 $\zeta$ ) transduced cells, after 48h co-culture with HT-29 HER2-expressing cells, with increasing concentrations of irrelevant antibody, cetuximab.



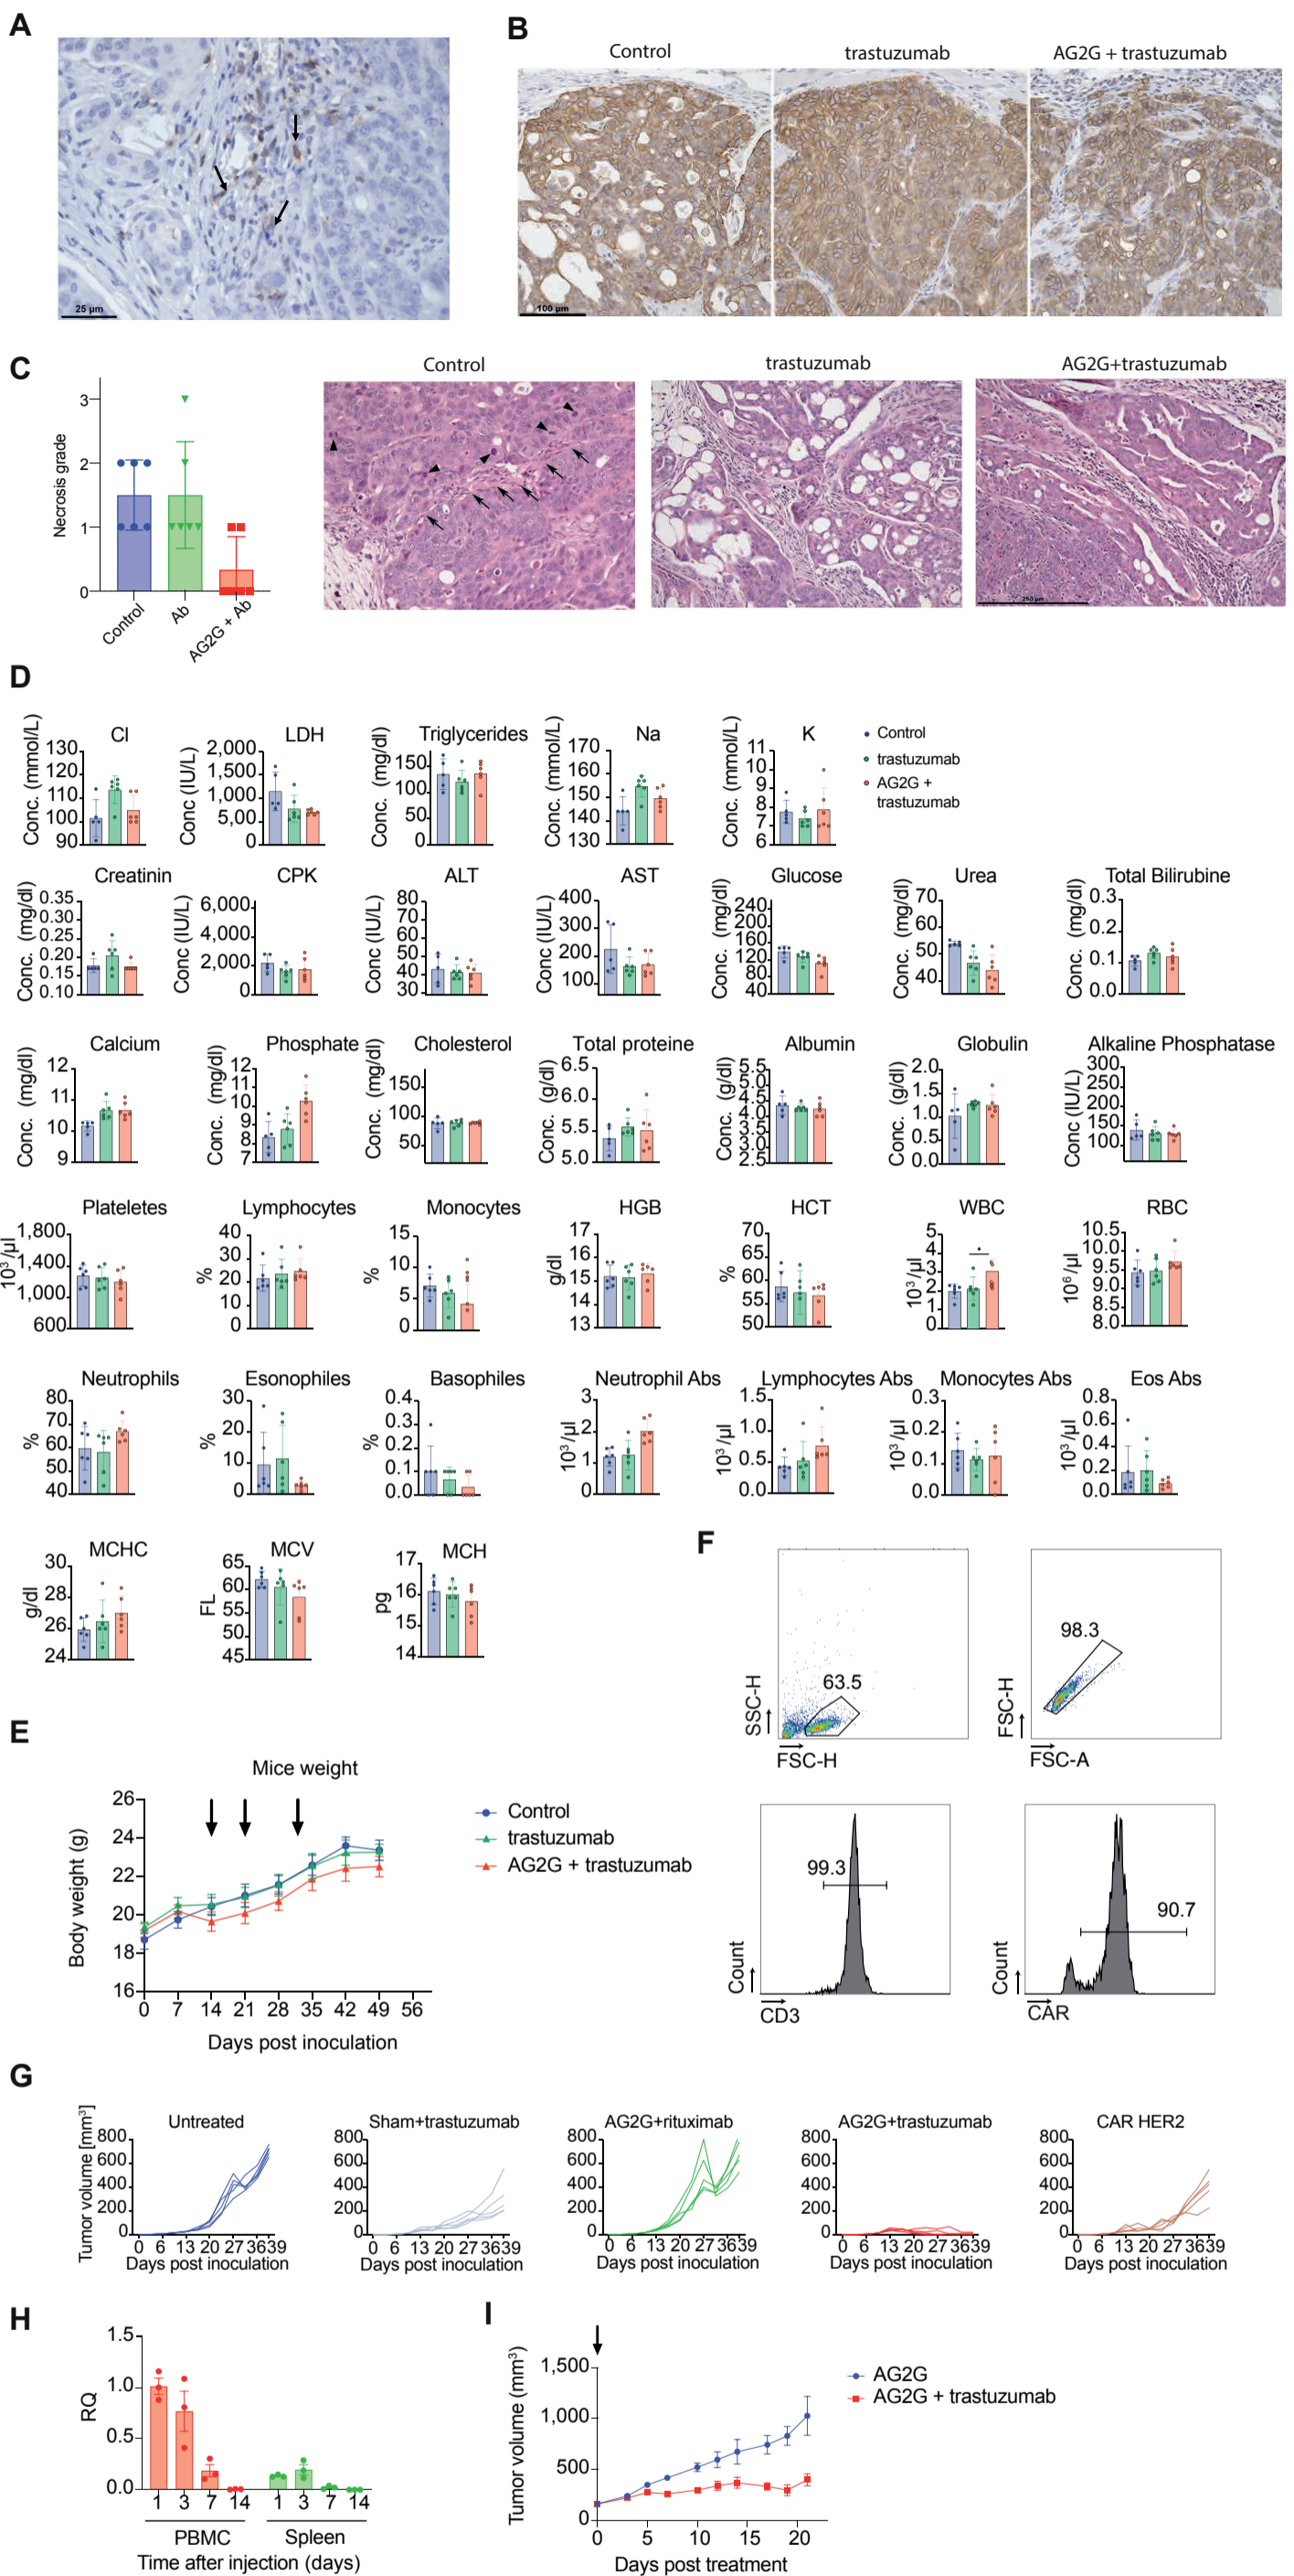

**Supplemental Figure S6. Systemic administration of AG2G-expressing T cells in combination with trastuzumab eradicates HER2-expressing tumor cells in vivo.**

**A.** Representative image of one tumor from AG2G+trastuzumab group stained with anti-human CD3 antibody (examples of CD3 stained cells are marked with arrows). Scale bar is 25 $\mu$ m. **B.** Representative images of one tumor from each treatment group stained with anti-human HER2 antibody. **C.** Necrosis was evaluated in HE stained sections according to the necrotic area in relation to the total tumor area and was graded as follows: Grade 0 – 0-10%; Grade 1 – 10-25%; Grade 2 – 25-50%; Grade 3 – 50-75%; Grade 4 - >75%; Results of the necrosis evaluation are summarized in a bar graph, Error bars stand for standard error. Medium power (objective x20) microphotograph of HE stained section of tumors representing tumor morphology. Arrowheads point to mitotic cells; Arrows delineate connective tissue septum. **D.** Blood cell count and chemistry of NSG mice at endpoint (42 days post treatment). **E.** Body weight graph of NSG mice experiment. Administration of treatments are marked with arrows. **F.** Flow cytometry analysis of CAR-HER2 transduced T cells with anti-CD3-FITC and protein-L-PE. **G.** Single mice tumor size graphs of NSG mice experiment described in Fig. 5F. **H.** Relative quantification by qPCR of human SolidT DNA sequence in spleen and PBMCs of naïve NSG mice at four time point (1,3,7 and 14 days) after introduction of  $5 \times 10^6$  AG2G T cells i.v. (n=3). Quantity was compared to mouse beta actin DNA by delta-delta Ct method. **I.** Tumor size graph of NSG mice described in Fig. 5G.

Table 3

| Group            | Sample | Brain | Lung | Heart | Kidney | Spleen                | Liver |
|------------------|--------|-------|------|-------|--------|-----------------------|-------|
| Control          | 9094   | -     | -    | -     | -      | -                     | -     |
|                  | 9094   | -     | -    | -     | -      | -                     | -     |
|                  | 9109   | -     | -    | -     | -      | -                     | -     |
|                  | 9111   | -     | -    | -     | -      | -                     | -     |
|                  | 9115   | -     | -    | -     | -      | -                     | -     |
|                  | 9154   | -     | -    | -     | -      | large calcified focus | -     |
| Trastuzumab      | 9097   | -     | -    | -     | -      | -                     | -     |
|                  | 9099   | -     | -    | -     | -      | -                     | -     |
|                  | 9100   | -     | -    | -     | -      | -                     | -     |
|                  | 9101   | -     | -    | -     | -      | -                     | -     |
|                  | 9110   | -     | -    | -     | -      | -                     | -     |
|                  | 9116   | -     | -    | -     | -      | -                     | -     |
| AG2G+Trastuzumab | 9096   | -     | -    | -     | -      | -                     | -     |
|                  | 9098   | -     | -    | -     | -      | -                     | -     |
|                  | 9107   | -     | -    | -     | -      | -                     | -     |
|                  | 9112   | -     | -    | -     | -      | -                     | -     |
|                  | 9113   | -     | -    | -     | -      | -                     | -     |



**A**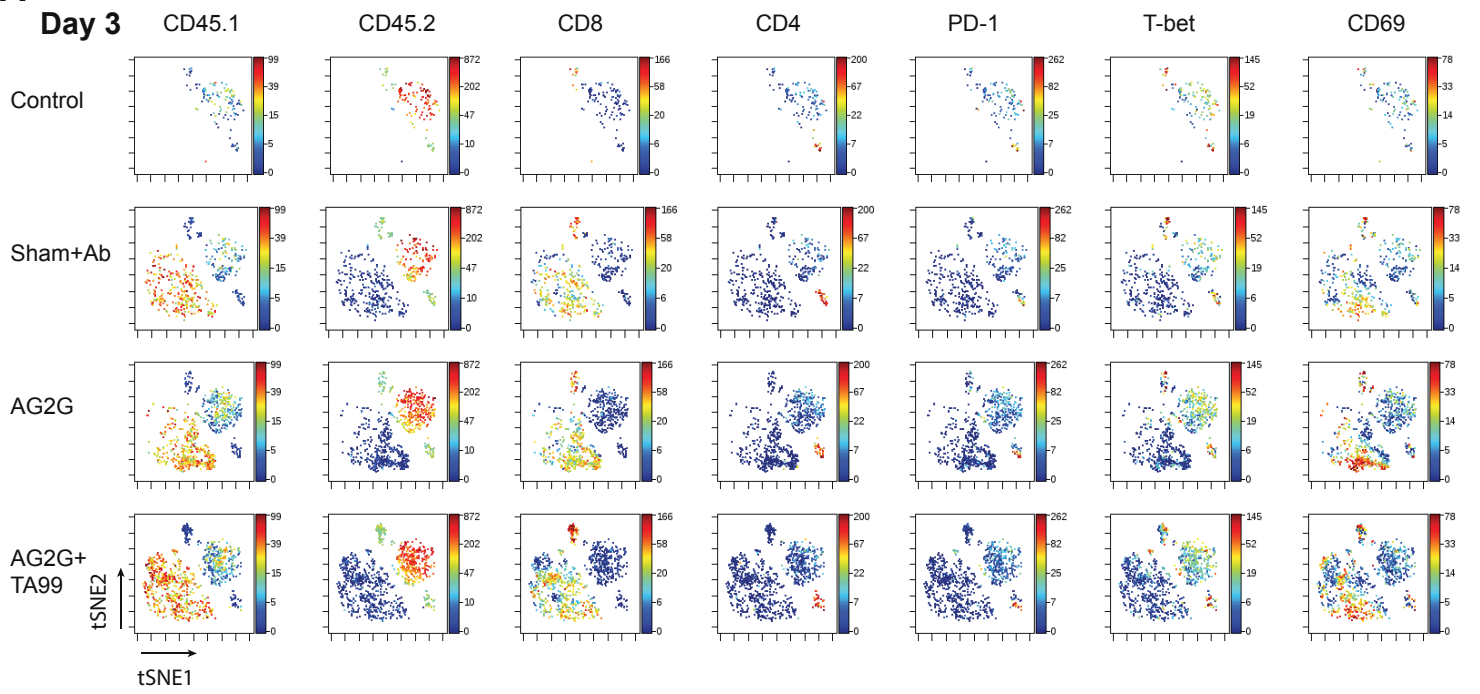**B**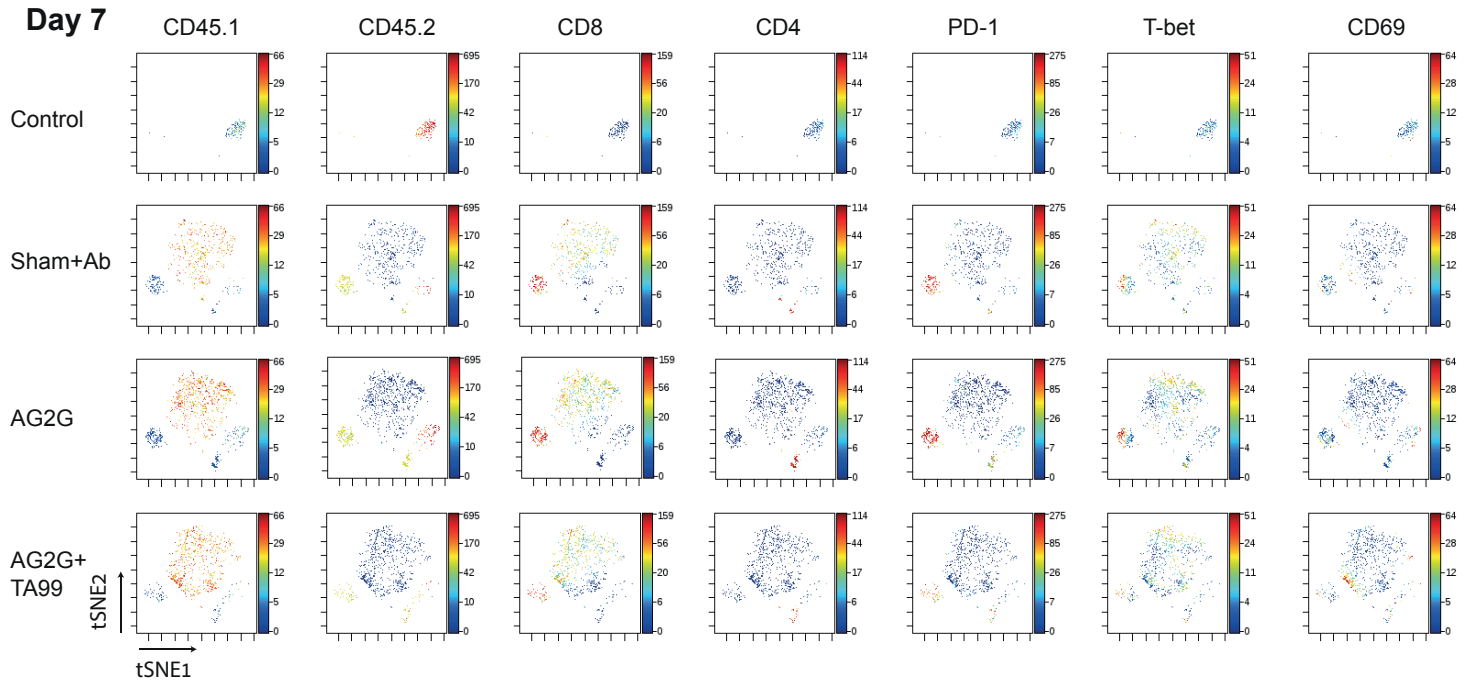**Day 7**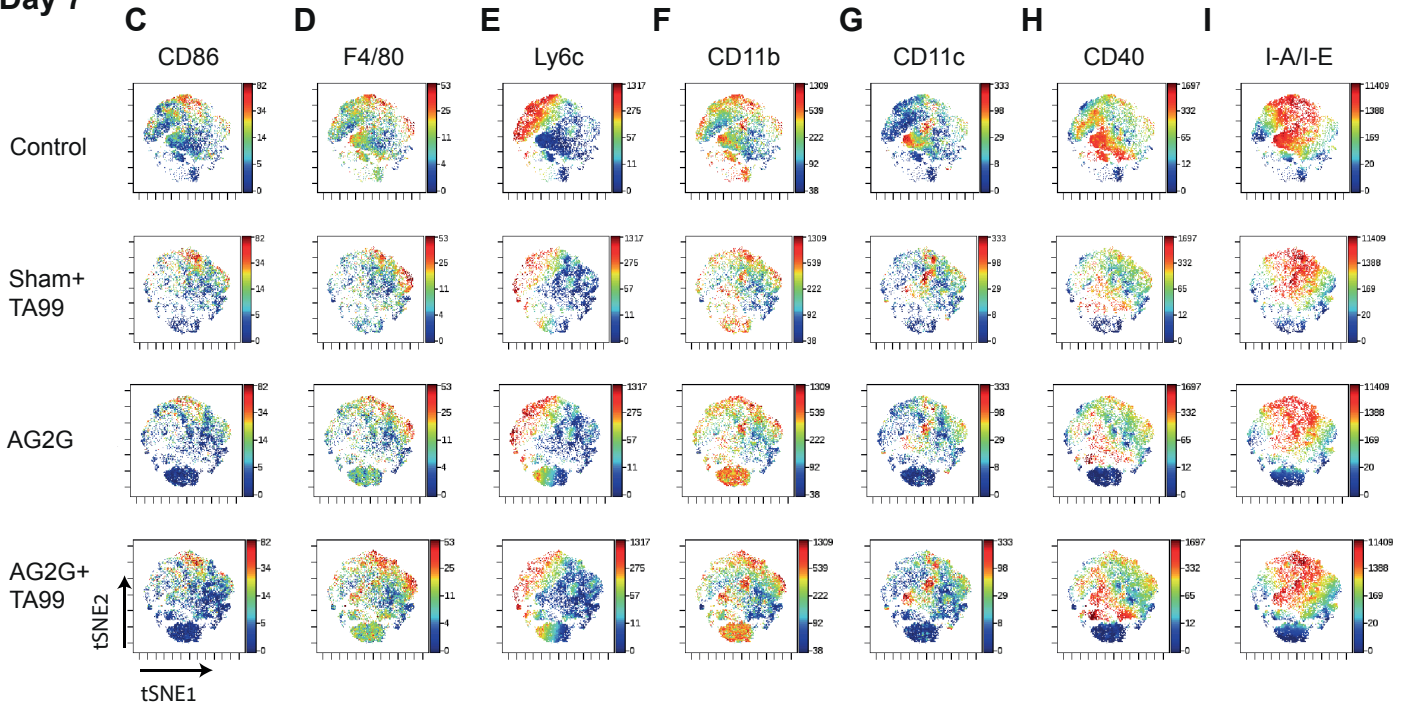

**J**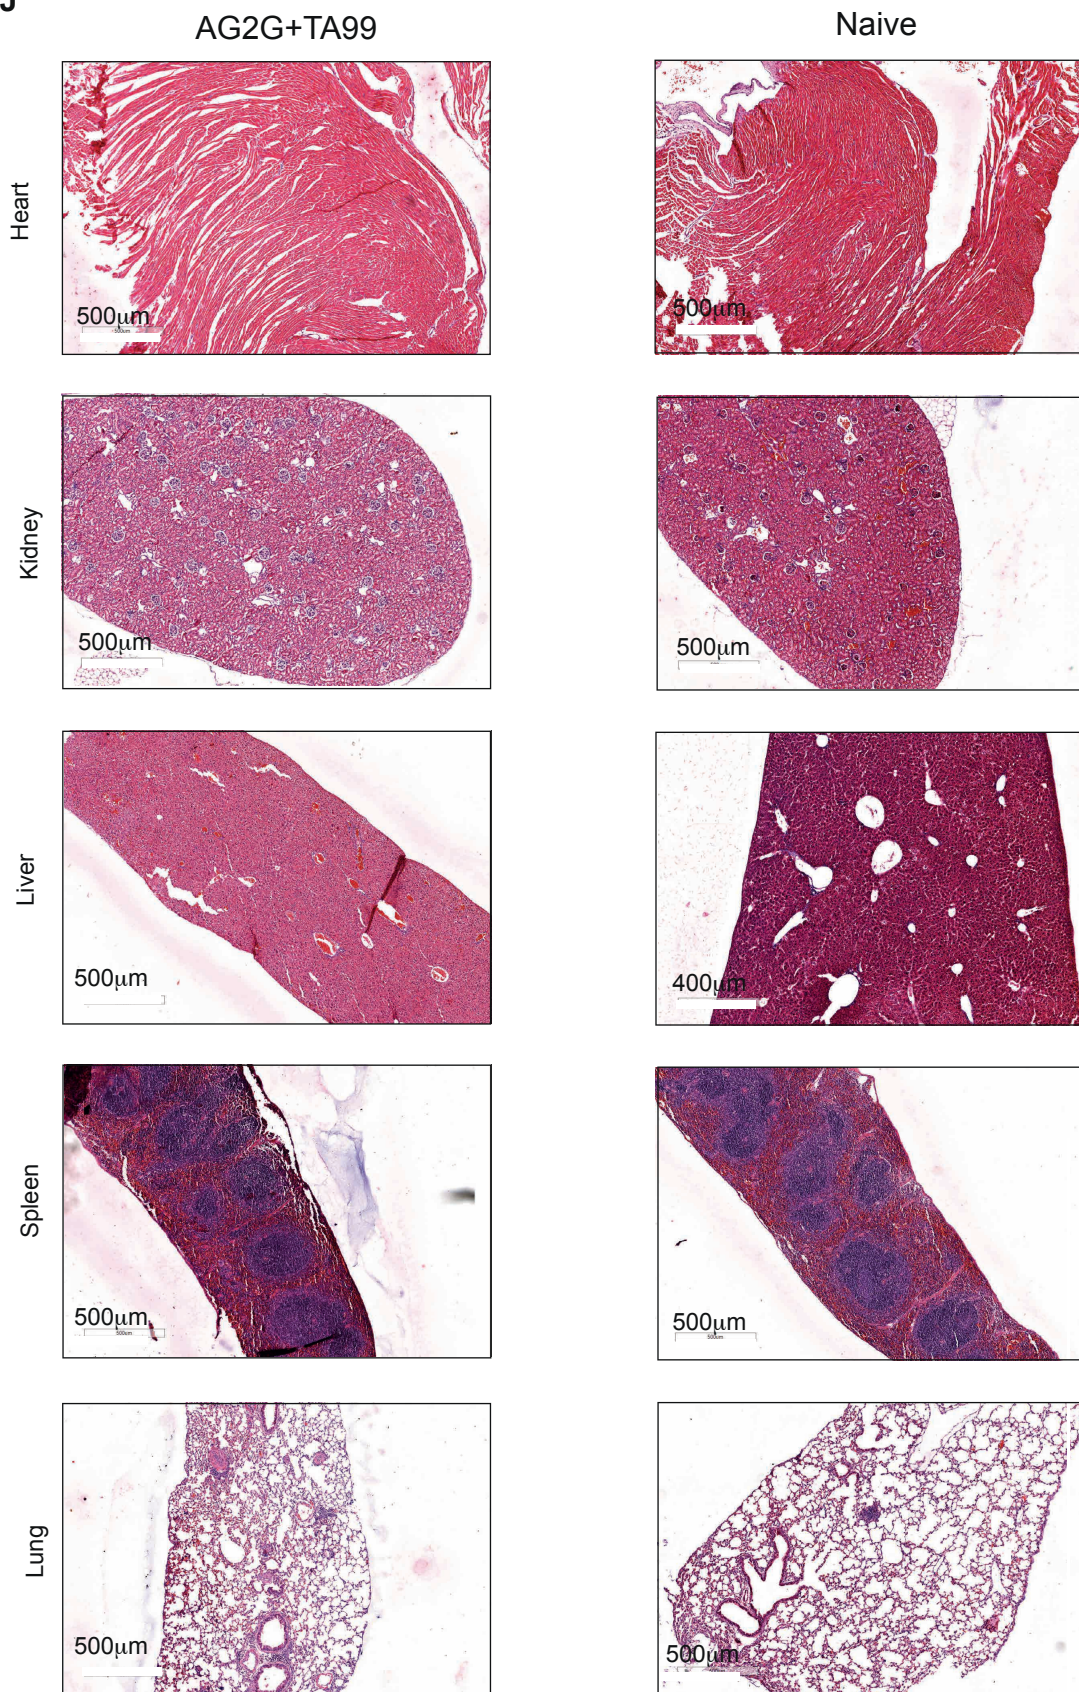

Supplemental Figure S7. CyTOF analysis of systemic administration of tumor-binding antibodies and AG2G-expressing T cells.

**A-B.** tSNE plots of CD3e+/TCRb+ donor and CD3e+/TCRb+ host infiltrating T cells in B16F10 tumors 3 days (**A**) and 7 days (**B**) post treatment with AG2G-expressing or mock transfected T cells with or without TA99 targeting antibody or control untreated mice. Heat map for each column represent the relative expression of the antigen in the title in a scale from low (Blue) to high (Red). **C-I.** High dimensional tSNE plots of expression of selected proteins on tumor-infiltrating myeloid cells CD45+/CD11b+ cells. each column displays a color heat map of the following antigens: **C.** CD86+, **D.** F4/80+, **E.** Ly6c+, **F.** CD11b+, **G.** CD11c+, **H.** CD40+, **I.** I-A/I-E. rows from top to bottom are control, Sham+TA99, AG2G and AG2G+ TA99 respectively for each panel. **J.** Histology of organs from Fig. 6B.



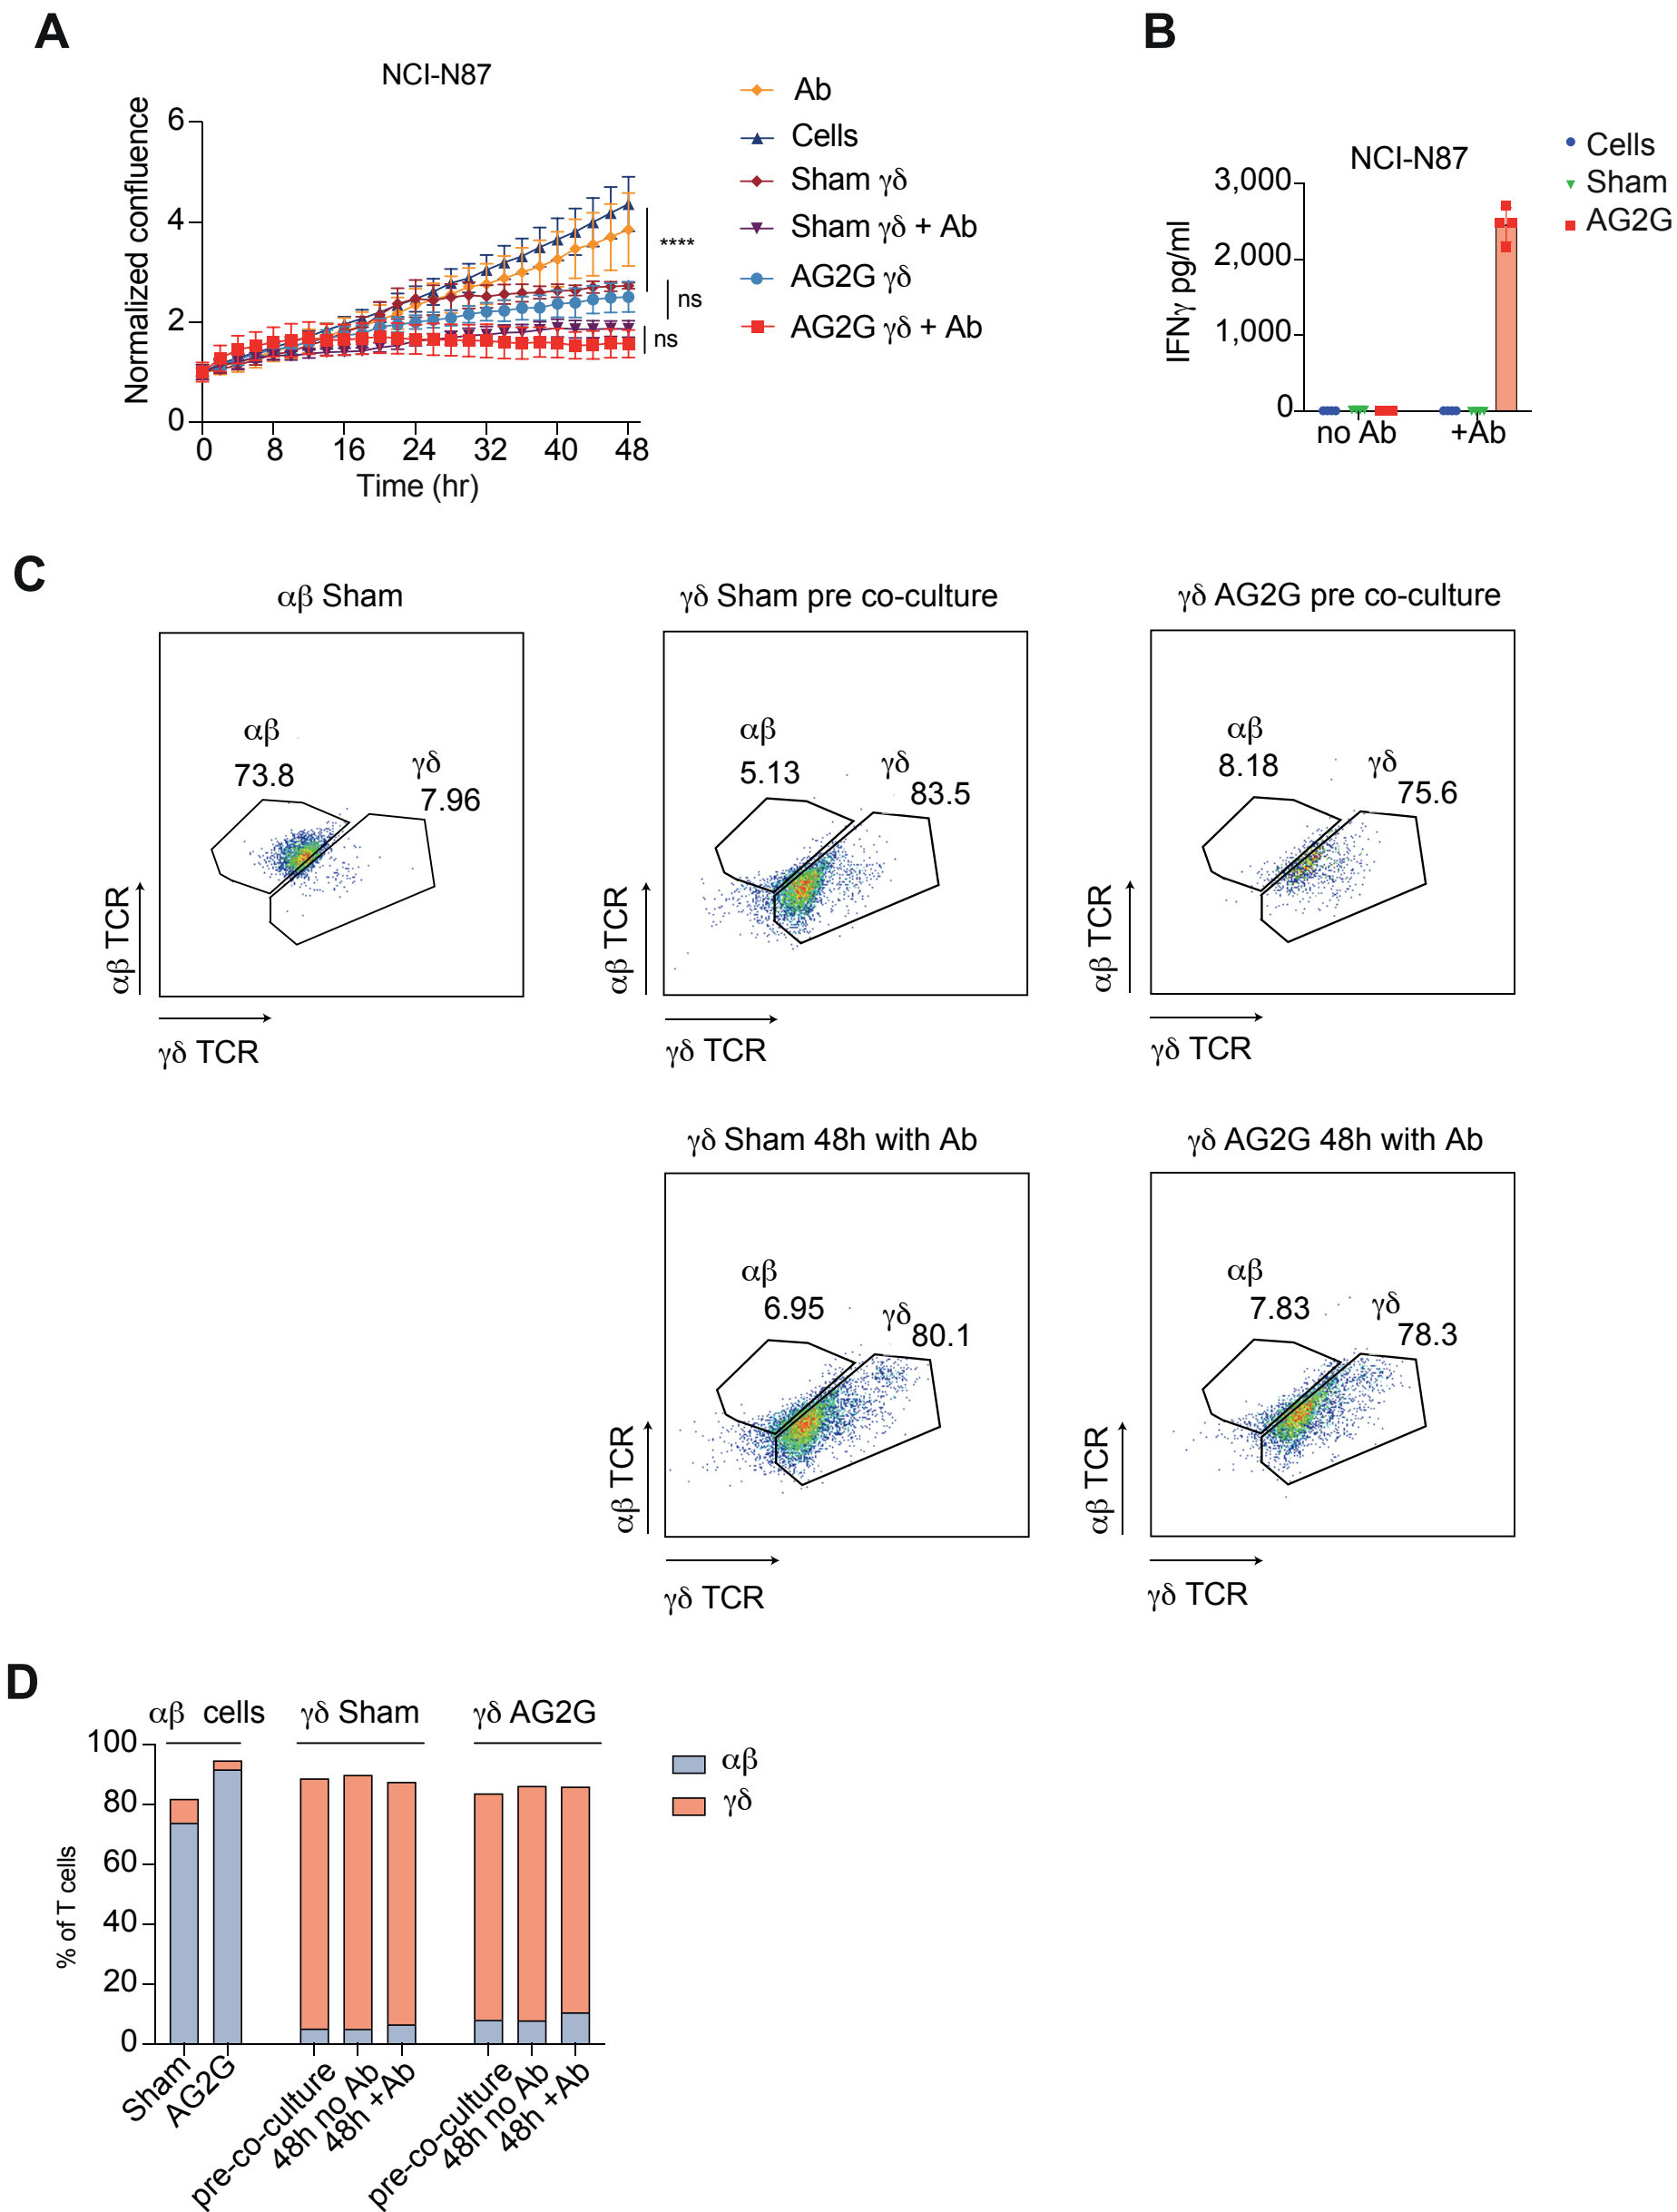

Supplemental Figure S8. Retroviral transduction of  $\gamma\delta$ -T cells with AG2G endows them with anti-tumor ADCC.

**A.** Confluence analysis of NCI-N87 tumor cells over 48 h of co-culture in IncuCyte imager with non-transduced  $\gamma\delta$ -T cells (Sham) with targeting antibody or AG2G-expressing  $\gamma\delta$ -T cells with or without targeting antibody (n=3, 4:1 E:T ratio, 30  $\mu\text{g}/\text{ml}$  antibody). **B.** IFN $\gamma$  levels from supernatants of  $\gamma\delta$ -T cells after 48h co-culture with NCI-N87 described in **A**. **C.** Flow cytometer analysis of  $\gamma\delta$ -T cells before cytotoxicity assay, and following cytotoxic 48 h co-culture with NCI-N87 target cells and trastuzumab (described in **A**). Cells were stained with anti- $\gamma\delta$ -TCR-BV605 and  $\gamma\delta$ -TCR-PE-Cy7.  $\gamma\delta$ -TCR-T cells served as control. **D.** Summary of percentage of population gated  $\gamma\delta$ -TCR $^-$ -T cells and  $\gamma\delta$ -TCR $^+$ -T cells population in flow cytometer analysis (described in **C**) before and after cytotoxic assay co-culture described in **A**.
